# Supplementary material for: Neurocognitive Screening in Patients Following SARS-CoV-2 Infection: Tools for Triage
Source: PubMed Central journal article supplement (PMC8845509; doi:10.21203/rs.3.rs-1127420/v1), 2022-02-07
Supplement: NIHPPrs1127420v1-supplement-1.pdf [file NIHPPrs1127420v1-supplement-1.pdf]

**Supplementary Table 1.** Sociodemographic and clinical characteristics of patients lost to follow-up.

|                                                | <b>Completed outcome assessments (n=102)</b> | <b>Did not complete outcome assessments (n=47)</b> | <i>p-value</i> |
|------------------------------------------------|----------------------------------------------|----------------------------------------------------|----------------|
| <b>Age, mean (SD)</b>                          | 52.55 (14.64)                                | 48.62 (16.55)                                      | 0.15           |
| <b>COVID-19 Severity Classification, n (%)</b> |                                              |                                                    | 0.007          |
| Ambulatory                                     | 77 (76%)                                     | 44 (94%)                                           |                |
| Hospitalized                                   | 25 (24%)                                     | 3 (6%)                                             |                |
| <b>Sex, n (%)</b>                              |                                              |                                                    | 0.72           |
| Males                                          | 42 (41%)                                     | 21 (45%)                                           |                |
| Females                                        | 60 (59%)                                     | 26 (55%)                                           |                |
| <b>Race, n (%)</b>                             |                                              |                                                    | 0.58           |
| American Indian                                | 0 (0 %)                                      | 0 (0%)                                             |                |
| Asian                                          | 5 (5%)                                       | 1 (2%)                                             |                |
| Native Hawaiian                                | 0 (0%)                                       | 0 (0%)                                             |                |
| Black                                          | 9 (9%)                                       | 2 (4%)                                             |                |
| White                                          | 87 (85%)                                     | 43 (92%)                                           |                |
| More than one race                             | 1 (1%)                                       | 1 (2%)                                             |                |
| <b>Ethnicity, n (%)</b>                        |                                              |                                                    | 0.46           |
| Hispanic                                       | 5 (5%)                                       | 4 (9%)                                             |                |
| Non-Hispanic                                   | 97 (95%)                                     | 43 (91%)                                           |                |

**Supplementary Table 2.** Objective Performance on neurocognitive test domains by group.

|                                                                                                                                               | <b>Overall<br/>(N=102)</b> | <b>Ambulatory<br/>(N=76)</b> | <b>Hospitalized<br/>(N= 26)</b> | <i>p-value</i> |
|-----------------------------------------------------------------------------------------------------------------------------------------------|----------------------------|------------------------------|---------------------------------|----------------|
| <b>Group mean and variance by cognitive domain<br/>(age-adjusted based on normative reference group; standardized scale: mean=100, SD=15)</b> |                            |                              |                                 |                |
| Neurocognitive Index, mean (SD)                                                                                                               | 95.59 (11.14)              | 95.93 (11.14)                | 94.41 (11.39)                   | 0.623          |
| Verbal Memory, mean (SD)                                                                                                                      | 94.04 (18.27)              | 95.79 (17.31)                | 89.00 (20.32)                   | 0.110          |
| Visual Memory, mean (SD)                                                                                                                      | 99.85 (14.36)              | 101.78 (12.62)               | 93.83 (17.80)                   | 0.020*         |
| Psychomotor Speed, mean (SD)                                                                                                                  | 94.03 (15.58)              | 95.45 (14.31)                | 89.23 (18.87)                   | 0.109          |
| Reaction Time, mean (SD)                                                                                                                      | 92.78 (11.65)              | 93.85 (11.63)                | 89.47 (11.32)                   | 0.136          |
| Complex Attention, mean (SD)                                                                                                                  | 101.68 (13.32)             | 102.03 (13.09)               | 100.58 (14.30)                  | 0.682          |
| Cognitive Flexibility, mean (SD)                                                                                                              | 95.78 (15.48)              | 96.75 (15.18)                | 92.63 (16.41)                   | 0.314          |
| <b>Group proportions of patients showing impaired performance (&lt;9<sup>th</sup> percentile) by cognitive domain</b>                         |                            |                              |                                 |                |
| <b>Neurocognitive Index, n (%)</b>                                                                                                            |                            |                              |                                 | 0.453          |
| Within normal limits                                                                                                                          | 68 (88%)                   | 53 (90%)                     | 15 (83%)                        |                |
| Impaired                                                                                                                                      | 9 (12%)                    | 6 (10%)                      | 3 (17%)                         |                |
| <b>Verbal Memory, n (%)</b>                                                                                                                   |                            |                              |                                 | 0.096          |
| Within normal limits                                                                                                                          | 78 (80%)                   | 61 (84%)                     | 17 (68%)                        |                |
| Impaired                                                                                                                                      | 20 (20%)                   | 12 (16%)                     | 8 (32%)                         |                |
| <b>Visual Memory, n (%)</b>                                                                                                                   |                            |                              |                                 | <0.001*        |
| Within normal limits                                                                                                                          | 86 (90%)                   | 70 (96%)                     | 16 (70%)                        |                |
| Impaired                                                                                                                                      | 10 (10%)                   | 3 (4%)                       | 7 (30%)                         |                |
| <b>Psychomotor Speed, n (%)</b>                                                                                                               |                            |                              |                                 | 0.008*         |
| Within normal limits                                                                                                                          | 76 (89%)                   | 63 (85%)                     | 13 (59%)                        |                |
| Impaired                                                                                                                                      | 20 (11%)                   | 11 (15%)                     | 9 (41%)                         |                |
| <b>Reaction Time, n (%)</b>                                                                                                                   |                            |                              |                                 | 0.245          |
| Within normal limits                                                                                                                          | 78 (89%)                   | 60 (91%)                     | 18 (82%)                        |                |
| Impaired                                                                                                                                      | 10 (11%)                   | 6 (9%)                       | 4 (18%)                         |                |
| <b>Complex Attention, n (%)</b>                                                                                                               |                            |                              |                                 | 0.524          |
| Within normal limits                                                                                                                          | 72 (89%)                   | 55 (90%)                     | 17 (85%)                        |                |
| Impaired                                                                                                                                      | 9 (11%)                    | 6 (10%)                      | 3 (15%)                         |                |
| <b>Cognitive Flexibility, n (%)</b>                                                                                                           |                            |                              |                                 | 0.456          |
| Within normal limits                                                                                                                          | 67 (81%)                   | 52 (83%)                     | 15 (75%)                        |                |
| Impaired                                                                                                                                      | 16 (19%)                   | 11 (17%)                     | 5 (25%)                         |                |
